# Supplementary material
Source: Springer Nature journal article supplement (https://www.springermedizin.de/resource/supplementary/13058_2011_2942_MOESM2_ESM.pdf/9702940)
Supplement: MOESM2 [file 9702940]

**A**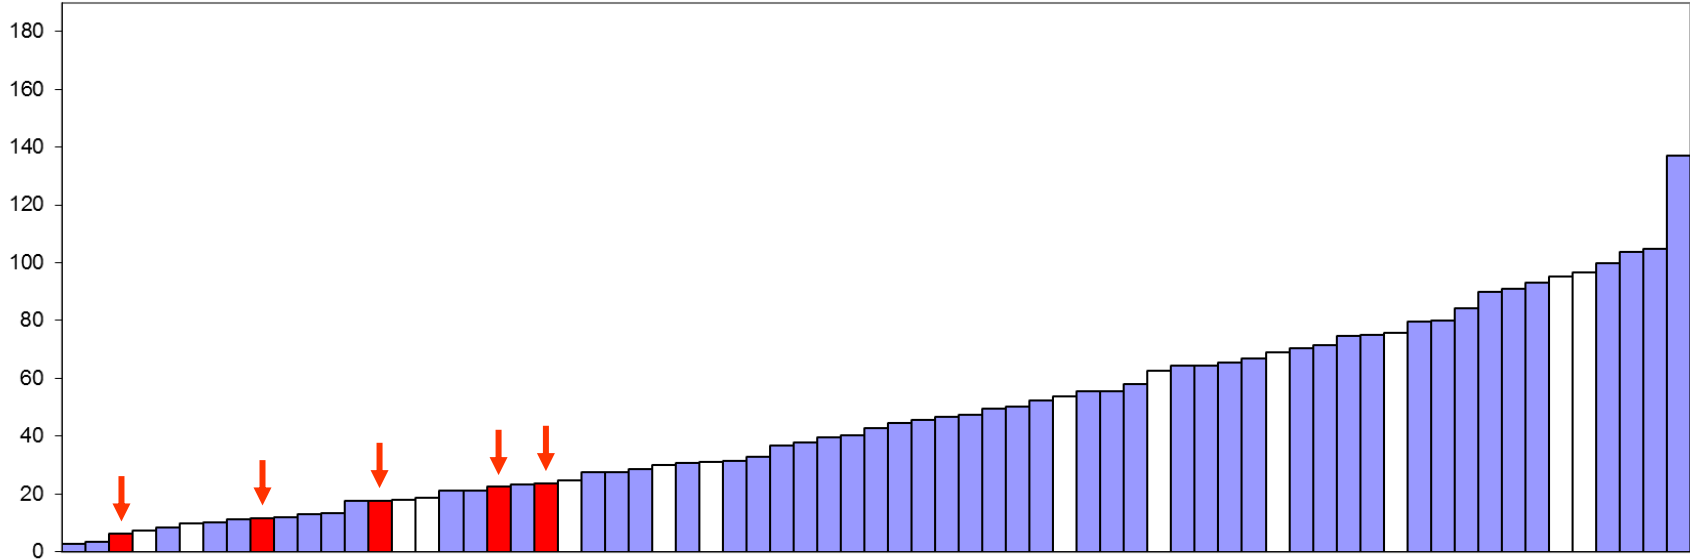**B**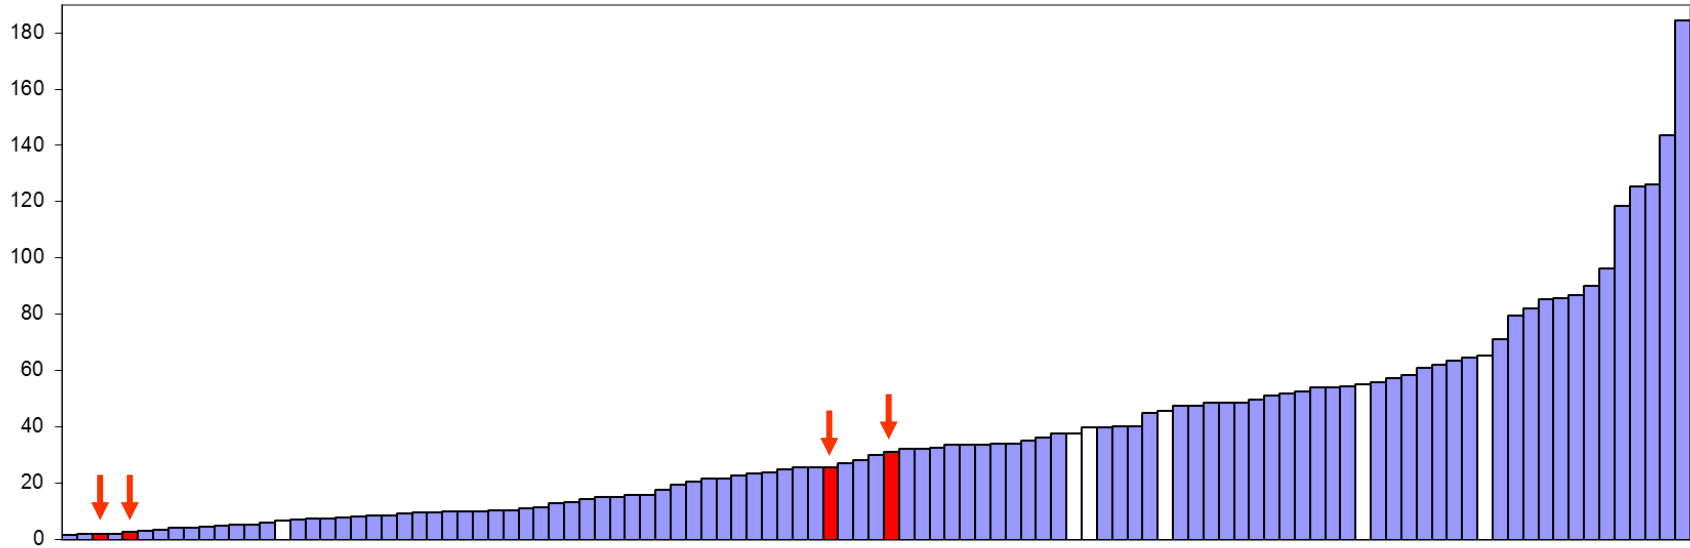

Legend:

- Patients with PR or SD
- Patients with PD harboring mutated *TP53* / *CHK2*
- Patients with PD harboring wild-type *TP53* / *CHK2*
